# Supplementary material
Source: publisher figshare collection journal article supplement (https://acs.figshare.com/ndownloader/files/4933393)
Supplement: Supplementary file 1 [file 4933393]

# **Large-Scale, Ion-Current-Based Proteomic Investigation of the Rat Striatal Proteome in a Model of Short- and Long-Term Cocaine Withdrawal**

**#Shichen Shen<sup>2,3</sup>, #Xiaosheng Jiang<sup>1,2</sup>, #Jun Li<sup>1,2</sup>, Robert M. Straubinger<sup>1</sup>, Mauricio Suarez<sup>4,5</sup>, Chengjian Tu<sup>2,3</sup>, Xiaotao Duan<sup>6</sup>, \*Alexis C. Thompson<sup>4,5</sup>, \*Jun Qu<sup>1,2</sup>**

*<sup>1</sup> Department of Pharmaceutical Sciences, SUNY at Buffalo, NY; <sup>2</sup> New York State Center of Excellence in Bioinformatics & Life Sciences, Buffalo, NY; <sup>3</sup> Department of Biochemistry, School of Medicine and Biomedical Sciences, SUNY at Buffalo, NY; <sup>4</sup> Department of Psychology, SUNY at Buffalo; <sup>5</sup> Research Institute on Addictions, SUNY at Buffalo, NY; <sup>6</sup> State Key Laboratory of Toxicology and Medical Countermeasures, Beijing Institute of Pharmacology and Toxicology, Beijing, China*

## **SUPPLEMENTARY FIGURES**

**Supplementary Figure S-1.** Representative base peak chromatogram.

**Supplementary Figure S-2.** Experimental estimation of FADR.

**Supplementary Figure S-3.** Fold changes of significantly altered proteins.

**Supplementary Figure S-4.** Protein interaction networks in WD1.

**Supplementary Figure S-5.** Protein interaction networks in WD22.

**Supplementary Figure S-6.** Western blot analysis of PKA expression & activity.

**Supplementary Figure S-7.** Density of p-PKC substrates.

RT: 2.77 - 312.12

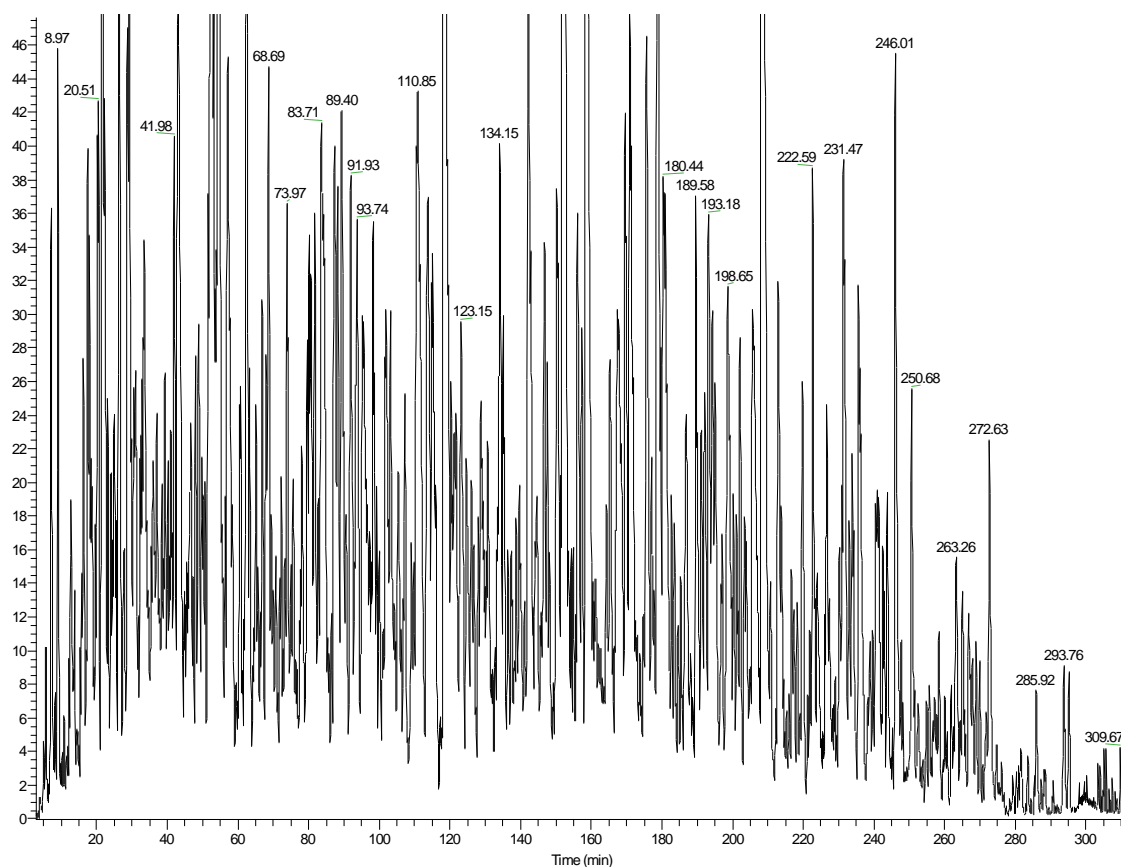

**Supplementary Figure S-1. A representative base peak chromatogram indicating the high-resolution separation of tryptic peptides derived from rat striatal proteins.** The separation was accomplished on a long nanoLC column with consistent heating at 52 °C, with an Orbitrap mass spectrometer as the detector.

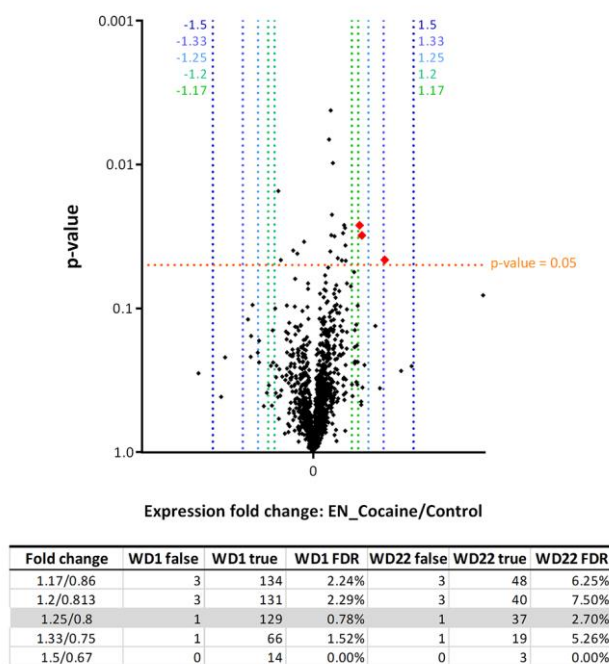

**Supplementary Figure S-2. The experimental estimation of False-positive Altered-protein Discovery Rate (FADR) and determination of rational ratio cutoff.** The Experimental Null (EN) procedure is described in our recent publication<sup>45</sup>. The null set comprising of 20 non-dosed animals randomly assigned to EN-control and EN-experimental groups (N=10/group). ples (10 as experimental, 10 as control) were analyzed using the same strategy as the real samples. The volcano plot shows the distribution of all identified proteins in terms of fold change and p-value. Dotted lines in different colors refer to the different cutoff thresholds for protein fold change. Red dots refer to the false positives under the given thresholds. The detailed information including the FDR are shown in the table. 1.25-fold change (expression ratio >1.25 or <0.8) was selected.

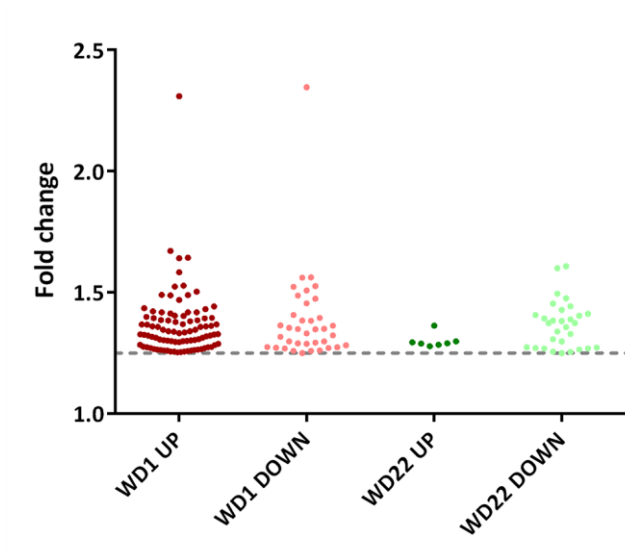

**Supplementary Figure S-3. Scatter plot of fold changes for significantly altered proteins.** The average fold changes are 1.38 and 1.33 for WD1 and WD22 respectively. The grey dotted line denotes the 1.25-fold threshold for significantly altered proteins.

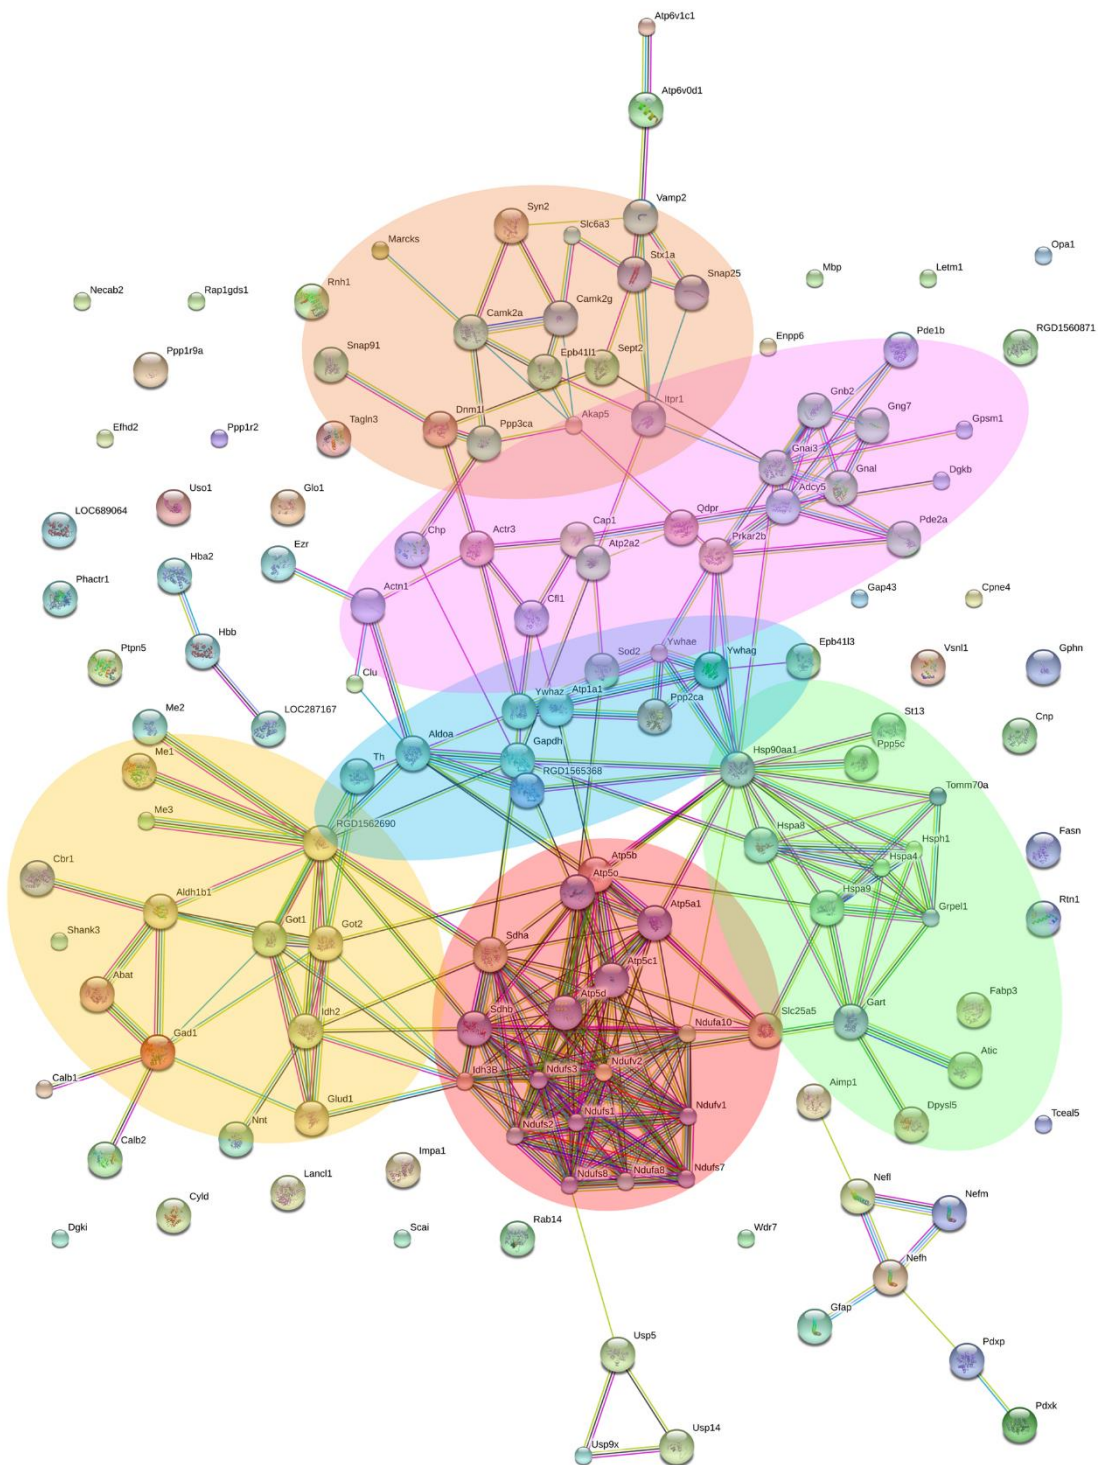

**Supplementary Figure S-4. Protein interaction networks in WD1, generated by STRING database/software.** Six clusters or “sub-networks”, highlighted in different colors, were identified. Red: glucose metabolism and energy production; Orange: calcium signaling and vesicle transport; Yellow: neurotransmitter metabolism; Green: stress response; Blue: 14-3-3 signaling; Purple: G-protein signaling, cAMP signaling and actin cytoskeleton.

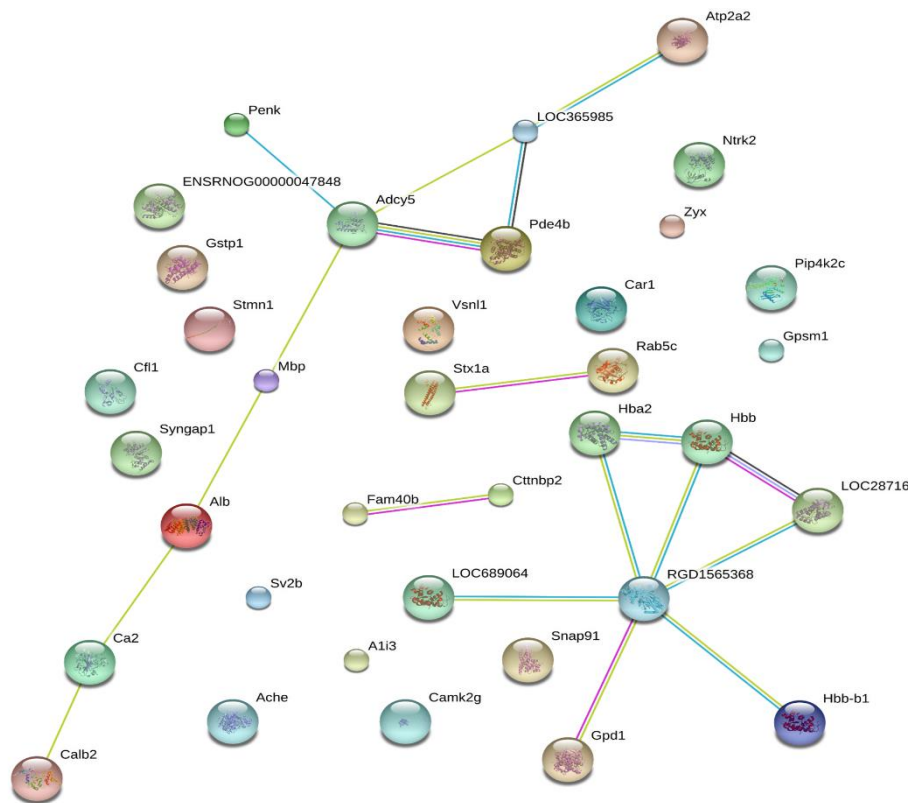

**Supplementary Figure S-5. Protein interaction networks in WD22, generated by STRING database/software.**

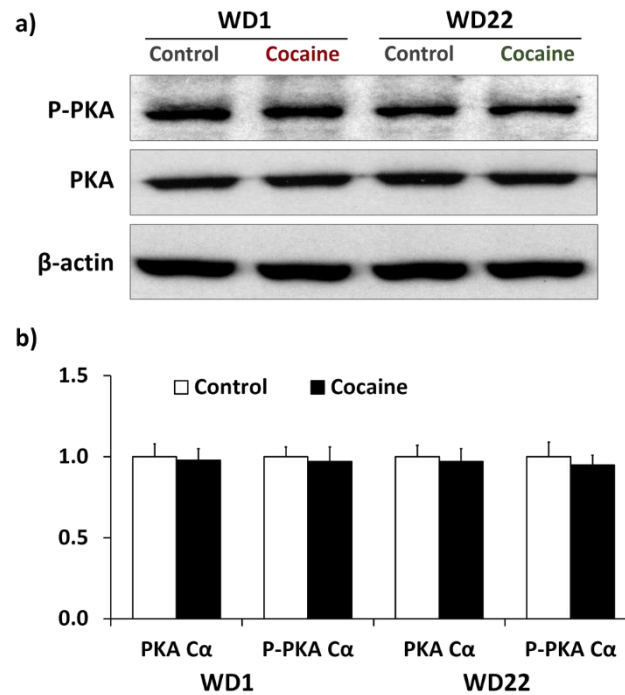

**Supplementary Figure S-6. Western blot analysis of PKA expression and activity.** a) Western blot images of PKA and p-PKA in both WD1 and WD22; b) Quantitative analysis of PKA and p-PKA by densitometry. The results suggested that PKA expression and phosphorylation (which is relevant to PKA activity) was not altered with either 1d or 22d cocaine withdrawal.

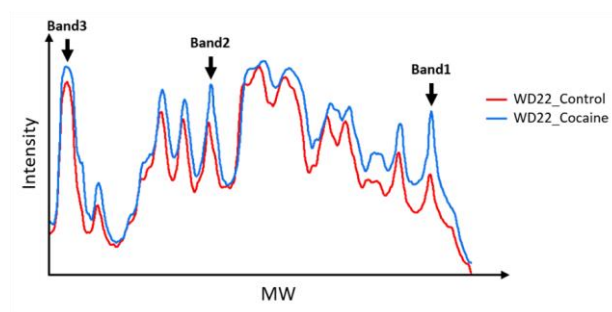

**Supplementary Figure S-7. Densitometry analysis of all putative bands detected in the phospho-PKC substrate immunoassay.** Band intensity from WD22\_Cocaine and WD22\_Control was compared, and higher intensity was observed globally in WD22\_Cocaine. Three representative bands distributed in different molecular weight ranges were selected and further compared in specific (**Figure 4d**).
